# Supplementary material for: Attitude to Co-Administration of Influenza and COVID-19 Vaccines among Pregnant Women Exploring the Health Action Process Approach Model
Source: MDPI journal article supplement (doi:10.3390/vaccines12050470), 2024-04-28
Supplement: s1 [file s1]

## Supplementary Materials

# Attitude to Co-Administration of Influenza and COVID-19 Vaccines among Pregnant Women Exploring the Health Action Process Approach Model

Alessandra Fallucca <sup>1,\*</sup>, Palmira Immordino <sup>1</sup>, Patrizia Ferro <sup>1</sup>, Luca Mazzeo <sup>1</sup>, Sefora Petta <sup>1</sup>, Antonio Maiorana <sup>2</sup>, Marianna Maranto <sup>2</sup>, Alessandra Casuccio <sup>1</sup> and Vincenzo Restivo <sup>3</sup>

- <sup>1</sup> Department of Health Promotion, Mother and Child Care, Internal Medicine and Medical Specialities, University of Palermo, 90127 Palermo, Italy; palmira.immordino@unipa.it (P.I.); patrizia.ferro@unipa.it (P.F.); luca.mazzeo@unipa.it (L.M.); sefora.petta@gmail.com (S.P.); alessandra.casuccio@unipa.it (A.C.)
- <sup>2</sup> HCU Obstetrics and Gynaecology, ARNAS Civico Di Cristina—Benfratelli Hospital, 90127 Palermo, Italy; antonio.maiorana@arnascivico.it (A.M.); marianna.maranto@arnascivico.it (M.M.)
- <sup>3</sup> School of Medicine, University Kore of Enna, 94100 Enna, Italy; vincenzo.restivo@unikore.it
- \* Correspondence: alessandra.fallucca@unipa.it; Tel.: +39-0916553630 or +39-3804703272

## Contents

|                                          |        |
|------------------------------------------|--------|
| S1: English version of the questionnaire | page 2 |
| S2: Italian version of the questionnaire | page 4 |

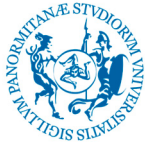

# Survey

## Attitude of pregnant women to receive co-administration of influenza and COVID-19

### SECTION A

1) How old are you??

\_\_\_\_\_

2) What is your nationality?

- ☐ Italian
- ☐ Foreign

3) Where are you resident??

- ☐ Palermo city
- ☐ Province of Palermo
- ☐ Other Sicilian cities
- ☐ Other Italian cities

4) What is your marital status??

- ☐ Single
- ☐ Engaged
- ☐ Married
- ☐ Divorced
- ☐ Cohabitant

5) What is your educational qualification??

- ☐ Primary school diploma
- ☐ Secondary school diploma
- ☐ High school diploma
- ☐ Degree/Higher qualification

6) What is your occupation?

- ☐ Employed
- ☐ Unemployed
- ☐ Housewife

7) What week of pregnancy are you?? \_\_\_\_\_

8) How many childrens do you have? \_\_\_\_\_

9) Is your pregnancy at risk??

- ☐ Yes
- ☐ No

10) If your answer is yes, what is the reason for the risk?

\_\_\_\_\_

11) What was your main source of information about vaccines?

- ☐ Gynecologist
- ☐ Family clinic health worker
- ☐ General practitioner
- ☐ Pediatrician
- ☐ Vaccination centre health worker
- ☐ Friends
- ☐ Family
- ☐ TV/Media
- ☐ Web/Internet
- ☐ Other

\_\_\_\_\_

12) Would you receive the influenza and the COVID-19 vaccine coadministered during pregnancy??

- ☐ Yes
- ☐ No

## SECTION B – Health Action Process Approach model

| <b>Risk perception</b>                                                                       | Strongly agree | Agree | Undecided | Disagree | Strongly disagree |
|----------------------------------------------------------------------------------------------|----------------|-------|-----------|----------|-------------------|
| SARS-CoV-2 and influenza infection could increase the risk of miscarriage                    |                |       |           |          |                   |
| SARS-CoV-2 and influenza infection could increase the risk of resorting to cesarean delivery |                |       |           |          |                   |

| <b>Positive outcomes</b>                                                                                           | Strongly agree | Agree | Undecided | Disagree | Strongly disagree |
|--------------------------------------------------------------------------------------------------------------------|----------------|-------|-----------|----------|-------------------|
| Co-administration of COVID-19 and influenza vaccines could reduce the risk of being hospitalized for complications |                |       |           |          |                   |
| Co-administration of COVID-19 and influenza vaccines could protect my baby in few first months of life             |                |       |           |          |                   |

| <b>Negative outcomes</b>                                                                                                                                                                        | Strongly agree | Agree | Undecided | Disagree | Strongly disagree |
|-------------------------------------------------------------------------------------------------------------------------------------------------------------------------------------------------|----------------|-------|-----------|----------|-------------------|
| Co-administration of COVID-19 and influenza vaccines could lead to the same frequency of side effects , such as fever or headache, as if the individual vaccines were given separately          |                |       |           |          |                   |
| Co-administration of COVID-19 and influenza vaccines could lead to the same frequency of side effects , such as pain, redness and swelling in the arms despite of given the individual vaccines |                |       |           |          |                   |

| <b>Self efficacy</b>                                                                                                                  | Strongly agree | Agree | Undecided | Disagree | Strongly disagree |
|---------------------------------------------------------------------------------------------------------------------------------------|----------------|-------|-----------|----------|-------------------|
| I am confident to have enough informations about co-administration of COVID19 and influenza vaccines to make the decision to get them |                |       |           |          |                   |
| I am sure to have co-administration even though my family/friends disagree                                                            |                |       |           |          |                   |

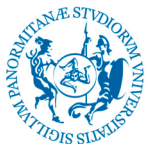

## Questionario

### Attitudine delle donne in gravidanza nei confronti della vaccinazione anti-influenzale e anti-SARS-COV2

#### SEZIONE A

- 1) Quanti anni ha?  
\_\_\_\_\_
- 2) Qual è la sua nazionalità?  
☐ Italiana  
☐ Estera
- 3) Dove è residente?  
☐ Palermo  
☐ Provincia di Palermo  
☐ Altre città siciliane  
☐ Altre città italiane
- 4) Qual è il suo stato civile attuale?  
☐ Nubile  
☐ Fidanzata  
☐ Sposata  
☐ Separata/Divorziata  
☐ Convivente
- 5) Qual è il suo titolo di studio?  
☐ Licenza elementare  
☐ Licenza media  
☐ Diploma di scuola superiore  
☐ Laurea/ Titolo superiore
- 6) Che attività lavorativa svolge?  
☐ Dipendente/impiegata  
☐ Disoccupata  
☐ Casalinga
- 7) In che settimana di gravidanza si trova? \_\_\_\_\_
- 8) Quanti figli ha? \_\_\_\_\_
- 9) La sua è una gravidanza a rischio?  
☐ Sì  
☐ No
- 10) Se sì, per quale ragione?  
\_\_\_\_\_
- 11) Quale è stata la sua principale fonte di informazione sulle vaccinazioni?  
☐ Ginecologo  
☐ Operatore sanitario del consultorio  
☐ Medico di Medicina Generale  
☐ Pediatra  
☐ Operatore sanitario del centro vaccinale  
☐ Amici  
☐ Parenti  
☐ TV/ Media  
☐ Web/ Internet  
☐ Altro  
\_\_\_\_\_
- 12) Durante la gravidanza riceverebbe una somministrazione contemporanea di due vaccini?  
☐ Sì  
☐ No

## SEZIONE B – Health Action Process Approach model

| <b>Percezione del rischio</b>                                                                          | Molto d'accordo | D'accordo | Indeciso | Disaccordo | Per niente d'accordo |
|--------------------------------------------------------------------------------------------------------|-----------------|-----------|----------|------------|----------------------|
| L'infezione da SARS-CoV-2 e virus influenzale potrebbe aumentare il rischio di aborto                  |                 |           |          |            |                      |
| L'infezione da SARS-CoV-2 e virus influenzale potrebbe aumentare il rischio di ricorso a parto cesareo |                 |           |          |            |                      |

| <b>Aspettative di esito positivo</b>                                                                                                                 | Molto d'accordo | D'accordo | Indeciso | Disaccordo | Per niente d'accordo |
|------------------------------------------------------------------------------------------------------------------------------------------------------|-----------------|-----------|----------|------------|----------------------|
| La co-somministrazione dei vaccini contro COVID-19 e influenza potrebbe ridurre il rischio di essere ricoverata per complicanze legate alle malattie |                 |           |          |            |                      |
| La co-somministrazione dei vaccini contro il COVID-19 e l'influenza potrebbe proteggere il mio bambino dalle infezioni nei primi mesi di vita        |                 |           |          |            |                      |

| <b>Aspettative di esito negativo</b>                                                                                                                                                                                                     | Molto d'accordo | D'accordo | Indeciso | Disaccordo | Per niente d'accordo |
|------------------------------------------------------------------------------------------------------------------------------------------------------------------------------------------------------------------------------------------|-----------------|-----------|----------|------------|----------------------|
| La co-somministrazione dei vaccini contro il COVID-19 e l'influenza può determinare la stessa frequenza di effetti indesiderati come febbre o mal di testa rispetto alla somministrazione separata dei singoli vaccini                   |                 |           |          |            |                      |
| La co-somministrazione dei vaccini contro il COVID-19 e l'influenza può determinare la stessa frequenza di effetti indesiderati come dolore, rossore e gonfiore alle braccia rispetto alla somministrazione separata dei singoli vaccini |                 |           |          |            |                      |

| <b>Autoefficacia</b>                                                                                                                       | Molto d'accordo | D'accordo | Indeciso | Disaccordo | Per niente d'accordo |
|--------------------------------------------------------------------------------------------------------------------------------------------|-----------------|-----------|----------|------------|----------------------|
| Sono sicura di avere abbastanza informazioni sulla co-somministrazione dei vaccini contro COVID-19 e influenza per poter decidere di farli |                 |           |          |            |                      |
| Sono sicura di potermi sottoporre alla co-somministrazione anche qualora i miei familiari/amici non siano d'accordo:                       |                 |           |          |            |                      |
